# Supplementary material
Source: Research Square preprint supplement (doi:10.21203/rs.3.rs-8530955/v1)
Supplement: Supplementary file 1 [file fece1d4c3f74c6ac3270887e.docx]

**Supplemental Table 1** Ischemic Heart Disease-related Mortality, Stratified by Sex and Race in Adult Colorectal Cancer Patients in the United States, 1999 to 2020

| **Deaths** | | | | | | | | | |
| --- | --- | --- | --- | --- | --- | --- | --- | --- | --- |
| **Year** | **Overall** | **Women** | **Men** | **NH White** | **NH Black or African American** | **NH Asian or Pacific Islander** | **NH American Indian or Alaska Native** | **Hispanic or Latino** | **Population** |
| 1999 | 3155 | 1521 | 1634 | 2770 | 260 | 34 | N/A | 60 | 180408769 |
| 2000 | 3187 | 1461 | 1726 | 2780 | 272 | 40 | N/A | 81 | 181984640 |
| 2001 | 2972 | 1351 | 1621 | 2537 | 281 | 46 | N/A | 94 | 184305128 |
| 2002 | 2952 | 1403 | 1549 | 2533 | 269 | 47 | 12 | 79 | 186208028 |
| 2003 | 2793 | 1313 | 1480 | 2404 | 230 | 41 | N/A | 95 | 188090429 |
| 2004 | 2502 | 1178 | 1324 | 2163 | 203 | 47 | N/A | 74 | 190205384 |
| 2005 | 2463 | 1106 | 1357 | 2118 | 204 | 39 | N/A | 94 | 192551384 |
| 2006 | 2264 | 1010 | 1254 | 1945 | 185 | 39 | N/A | 81 | 195019359 |
| 2007 | 2127 | 915 | 1212 | 1808 | 192 | 41 | N/A | 79 | 197403777 |
| 2008 | 2018 | 942 | 1076 | 1689 | 201 | 29 | N/A | 87 | 199795090 |
| 2009 | 1821 | 782 | 1039 | 1501 | 183 | 48 | N/A | 82 | 202107016 |
| 2010 | 1758 | 748 | 1010 | 1478 | 152 | 39 | N/A | 73 | 203891983 |
| 2011 | 1592 | 695 | 897 | 1332 | 146 | 25 | N/A | 74 | 206592936 |
| 2012 | 1550 | 660 | 890 | 1283 | 137 | 38 | N/A | 78 | 208826037 |
| 2013 | 1455 | 568 | 887 | 1191 | 146 | 38 | N/A | 71 | 211085314 |
| 2014 | 1397 | 559 | 838 | 1158 | 124 | 33 | N/A | 72 | 213809280 |
| 2015 | 1311 | 511 | 800 | 1065 | 126 | 31 | N/A | 77 | 216553817 |
| 2016 | 1154 | 424 | 730 | 941 | 120 | 28 | N/A | 49 | 218641417 |
| 2017 | 1242 | 429 | 813 | 990 | 126 | 34 | N/A | 81 | 221447331 |
| 2018 | 1242 | 470 | 772 | 1000 | 127 | 36 | N/A | 70 | 223311190 |
| 2019 | 1192 | 412 | 780 | 936 | 129 | 28 | 10 | 83 | 224981167 |
| 2020 | 1248 | 479 | 769 | 986 | 122 | 50 | N/A | 72 | 226635013 |
| **Total** | 43395 | 18937 | 24458 | 36608 | 3935 | 831 | 22 | 1706 | 4473854489 |

NH, Non-Hispanic ; N/A= not available (unreliable or suppressed)

**Supplemental Table 2** Ischemic Heart Disease-related Mortality, Stratified by Place of Death in Adult Colorectal Cancer Patients in the United States, 1999 to 2020

| **Deaths** | | | | |
| --- | --- | --- | --- | --- |
| **Year** | **Medical**  **Facility** | **Nursing Home/Long-term**  **Care Facility** | **Hospices** | **Home** |
| 1999 | 1567 | 855 | N/A | 652 |
| 2000 | 1651 | 810 | N/A | 652 |
| 2001 | 1463 | 787 | N/A | 636 |
| 2002 | 1453 | 795 | N/A | 640 |
| 2003 | 1366 | 739 | N/A | 602 |
| 2004 | 1131 | 668 | 13 | 597 |
| 2005 | 1103 | 668 | 28 | 588 |
| 2006 | 1001 | 620 | 36 | 544 |
| 2007 | 958 | 550 | 35 | 515 |
| 2008 | 898 | 532 | 38 | 464 |
| 2009 | 755 | 458 | 45 | 482 |
| 2010 | 749 | 443 | 43 | 457 |
| 2011 | 677 | 391 | 39 | 437 |
| 2012 | 612 | 383 | 39 | 469 |
| 2013 | 558 | 339 | 37 | 459 |
| 2014 | 498 | 336 | 42 | 464 |
| 2015 | 472 | 319 | 45 | 430 |
| 2016 | 423 | 224 | 44 | 416 |
| 2017 | 427 | 283 | 49 | 429 |
| 2018 | 434 | 265 | 46 | 440 |
| 2019 | 438 | 239 | 46 | 431 |
| 2020 | 388 | 225 | 56 | 525 |
| **Total** | 19022 | 10929 | 685 | 11329 |

N/A= not available (unreliable or suppressed)

**Supplemental Table 3** Annual percent change (APC) of Ischemic Heart Disease–related Age-Adjusted Mortality Rates per 100,000 in Adult Colorectal Cancer Patients in the United States, 1999 to 2020

| **Year Interval** | **APC (95% CI)** | **P value** |
| --- | --- | --- |
| **Overall** | | |
| 1999-2002 | -3.65 (-6.25 to -0.98) | = 0.011 |
| 2002-2016 | -8.26 (-8.59 to -7.92) | < 0.001 |
| 2016-2020 | -1.76 (-4.43 to 0.98) | = 0.187 |
| **Men** | | |
| 1999-2001 | -1.89 (-9.58 to -6.47) | = 0.625 |
| 2001-2015 | -7.85 (-8.33 to -7.37) | < 0.001 |
| 2015-2020 | -3.15 (-5.75 to -0.49) | = 0.024 |
| **Women** | | |
| 1999-2003 | -4.47 (-7.44 to -1.41) | = 0.008 |
| 2003-2017 | -9.44 (-10.11 to -8.76) | < 0.001 |
| 2017-2020 | 2.06 (-6.56 to 11.46) | = 0.628 |
| **Young Adults (25-44 years)** | | |
| 1999-2020 | N/A | N/A |
| **Middle Aged Adults (45-64 years)** | | |
| 1999-2020 | -3.95 (-4.99 to -2.89) | < 0.001 |
| **Older Adults (65 years and above)** | | |
| 1999-2003 | -4.97 (-6.77 to -3.14) | < 0.001 |
| 2003-2016 | -8.62 (-9.06 to -8.19) | < 0.001 |
| 2016-2020 | -2.09 (-5.09 to 1.02) | = 0.170 |
| **NH American Indian or Alaska Native** | | |
| 1999-2020 | N/A | N/A |
| **NH Black or African American** | | |
| 1999-2001 | 4.84 (-7.99 to 19.47) | = 0.428 |
| 2001-2004 | -12.70 (-23.79 to -0.00) | = 0.050 |
| 2004-2008 | -3.92 (-10.97 to 3.67) | = 0.260 |
| 2008-2014 | -10.09 (-13.46 to -6.58) | < 0.001 |
| 2014-2020 | -3.70 (-6.83 to -0.47) | = 0.030 |
| **Hispanic or Latino** | | |
| 1999-2020 | -6.27 (-7.22 to -5.32) | < 0.001 |
| **NH Asian or Pacific Islander** | | |
| 1999-2020 | -7.45 (-8.72 to -6.16) | < 0.001 |
| **NH White** | | |
| 1999-2003 | -5.10 (-7.21 to -2.94) | < 0.001 |
| 2003-2016 | -8.24 (-8.75 to -7.72) | < 0.001 |
| 2016-2020 | -1.98 (-5.56 to 1.73) | = 0.268 |
| **Non-metropolitan areas** | | |
| 1999-2003 | -2.91 (-6.44 to 0.76) | = 0.110 |
| 2003-2016 | -7.26 (-8.08 to -6.43) | < 0.001 |
| 2016-2020 | 1.29 (-4.09 to 6.97) | = 0.623 |
| **Metropolitan area** | | |
| 1999-2002 | -4.58 (-8.16 to -0.86) | = 0.020 |
| 2002-2016 | -8.53 (-9.00 to -8.05) | < 0.001 |
| 2016-2020 | -2.30 (-6.09 to 1.64) | = 0.227 |
| **Northeast** | | |
| 1999-2003 | -4.76 (-7.92 to -1.48) | = 0.008 |
| 2003-2018 | -8.24 (-8.89 to -7.59) | < 0.001 |
| 2018-2020 | 2.74 (-14.96 to 24.13) | = 0.764 |
| **Midwest** | | |
| 1999-2020 | -7.33 (-7.77 to -6.90) | < 0.001 |
| **South** | | |
| 1999-2001 | 0.18 (-8.02 to 9.11) | = 0.964 |
| 2001-2016 | -7.93 ( -8.39 to -7.47) | < 0.001 |
| 2016-2020 | 0.93 (-3.01 to 5.02) | = 0.626 |
| **West** | | |
| 1999-2017 | -7.88 (-8.40 to -7.36) | < 0.001 |
| 2017-2020 | 1.59 (-8.54 to 12.84) | = 0.755 |

APC = Annual percent change; NH = Non-Hispanic. N/A = Not available (unreliable or suppressed)

**Supplemental Table 4** Overall and Sex‐Stratified Ischemic Heart Disease-related Age-Adjusted Mortality Rates per 100,000 in Adult Colorectal Cancer Patients in the United States from 1999 to 2020

| **Age-Adjusted Rate (95% CI)** | | | |
| --- | --- | --- | --- |
| **Year** | **Men** | **Women** | **Overall** |
| 1999 | 2.53 (2.40-2.65) | 1.33 (1.26-1.40) | 1.80 (1.73-1.86) |
| 2000 | 2.62 (2.49-2.74) | 1.26 (1.20-1.33) | 1.80 (1.74-1.86) |
| 2001 | 2.43 (2.31-2.55) | 1.16 (1.10-1.22) | 1.65 (1.59-1.71) |
| 2002 | 2.27 (2.16-2.39) | 1.18 (1.12-1.24) | 1.62 (1.56-1.68) |
| 2003 | 2.12 (2.01-2.23) | 1.09 (1.03-1.15) | 1.51 (1.46-1.57) |
| 2004 | 1.87 (1.77-1.97) | 0.97 (0.92-1.03) | 1.32 (1.27-1.37) |
| 2005 | 1.87 (1.77-1.97) | 0.90 (0.85-0.96) | 1.28 (1.23-1.33) |
| 2006 | 1.68 (1.58-1.77) | 0.80 (0.75-0.85) | 1.16 (1.11-1.21) |
| 2007 | 1.56 (1.47-1.65) | 0.72 (0.67-0.77) | 1.07 (1.02-1.11) |
| 2008 | 1.34 (1.26-1.42) | 0.73 (0.69-0.78) | 0.99 (0.95-1.03) |
| 2009 | 1.27 (1.19-1.34) | 0.59 (0.55-0.64) | 0.87 (0.83-0.91) |
| 2010 | 1.19 (1.12-1.27) | 0.56 (0.52-0.60) | 0.82 (0.78-0.86) |
| 2011 | 1.05 (0.98-1.12) | 0.50 (0.46-0.54) | 0.73 (0.69-0.77) |
| 2012 | 0.99 (0.92-1.05) | 0.47 (0.43-0.51) | 0.69 (0.66-0.73) |
| 2013 | 0.95 (0.88-1.01) | 0.39 (0.36-0.42) | 0.63 (0.60-0.66) |
| 2014 | 0.88 (0.82-0.94) | 0.37 (0.34-0.41) | 0.60 (0.57-0.64) |
| 2015 | 0.81 (0.75-0.87) | 0.34 (0.31-0.37) | 0.54 (0.51-0.57) |
| 2016 | 0.72 (0.67-0.78) | 0.28 (0.26-0.31) | 0.45 (0.43-0.48) |
| 2017 | 0.79 (0.73-0.84) | 0.27 (0.24-0.29) | 0.48 (0.46-0.51) |
| 2018 | 0.70 (0.65-0.75) | 0.30 (0.27-0.32) | 0.47 (0.44-0.50) |
| 2019 | 0.69 (0.64-0.74) | 0.26 (0.24-0.29) | 0.46 (0.43-0.48) |
| 2020 | 0.68 (0.63-0.73) | 0.30 (0.27-0.33) | 0.45 (0.43-0.48) |
| **Overall** | 1.30 (1.29-1.32) | 0.63 (0.63-0.64) | 0.91 (0.90-0.92) |

**Supplemental Table 5** Ischemic Heart Disease-related Mortality, Stratified by Age group in Adult Colorectal Cancer Patients in the United States, 1999 to 2020

|  | **Deaths** | | | **Age-Adjusted Rate (95% CI)** | | |
| --- | --- | --- | --- | --- | --- | --- |
| **Year** | **Young Adults** | **Middle Aged Adults** | **Older Adults** | **Young Adults** | **Middle Aged Adults** | **Older Adults** |
| 1999 | N/A | 152 | 3001 | N/A | 0.26 (0.21-0.30) | 8.74 (8.43-9.06) |
| 2000 | N/A | 147 | 3039 | N/A | 0.26 (0.22-0.30) | 8.75 (8.44-9.06) |
| 2001 | N/A | 165 | 2804 | N/A | 0.30 (0.25-0.34) | 7.94 (7.65-8.23) |
| 2002 | N/A | 175 | 2773 | N/A | 0.30 (0.25-0.34) | 7.76 (7.47-8.05) |
| 2003 | N/A | 156 | 2636 | N/A | 0.26 (0.22-0.30) | 7.29 (7.01-7.57) |
| 2004 | N/A | 155 | 2345 | N/A | 0.22 (0.18-0.25) | 6.39 (6.13-6.64) |
| 2005 | N/A | 167 | 2294 | N/A | 0.22 (0.18-0.25) | 6.15 (5.90-6.40) |
| 2006 | N/A | 151 | 2110 | N/A | 0.22 (0.18-0.25) | 5.57 (5.33-5.81) |
| 2007 | N/A | 160 | 1962 | N/A | 0.22 (0.18-0.25) | 5.07 (4.85-5.29) |
| 2008 | N/A | 138 | 1878 | N/A | 0.18 (0.15-0.21) | 4.75 (4.53-4.96) |
| 2009 | N/A | 148 | 1670 | N/A | 0.18 (0.15-0.21) | 4.12 (3.92-4.31) |
| 2010 | N/A | 128 | 1625 | N/A | 0.12 (0.10-0.14) | 3.97 (3.78-4.16) |
| 2011 | N/A | 108 | 1479 | N/A | 0.14 (0.11-0.17) | 3.49 (3.31-3.67) |
| 2012 | N/A | 136 | 1412 | N/A | 0.18 (0.15-0.21) | 3.24 (3.07-3.41) |
| 2013 | N/A | 142 | 1307 | N/A | 0.18 (0.15-0.21) | 2.90 (2.75-3.06) |
| 2014 | N/A | 129 | 1264 | N/A | 0.18 (0.15-0.21) | 2.77 (2.62-2.93) |
| 2015 | N/A | 126 | 1181 | N/A | 0.14 (0.11-0.17) | 2.53 (2.39-2.68) |
| 2016 | N/A | 126 | 1023 | N/A | 0.12 (0.10-0.14) | 2.11 (1.98-2.25) |
| 2017 | 0 | 143 | 1099 | Unreliable (0.00-0.00) | 0.12 (0.10-0.14) | 2.26 (2.13-2.40) |
| 2018 | N/A | 136 | 1103 | N/A | 0.14 (0.11-0.16) | 2.17 (2.04-2.29) |
| 2019 | 0 | 146 | 1046 | Unreliable (0.00-0.00) | 0.18 (0.15-0.21) | 2.03 (1.90-2.15) |
| 2020 | N/A | 133 | 1109 | N/A | 0.12 (0.10-0.14) | 2.11 (1.99-2.24) |
| **Overall** | 68 | 3167 | 40160 | 0.00 (0.00-0.00) | 0.18 (0.17-0.19) | 4.36 (4.31-4.40) |

Young Adult = 25-44 years; Middle Aged Adults = 45-64 years; Older Adults = 65 years and above; N/A = not available (unreliable or suppressed)

**Supplemental Table 6** Ischemic Heart Disease-related Age-Adjusted Mortality Rates per 100,000 stratified by Race in Adult Colorectal Cancer Patients in the United States from 1999 to 2020

| **Age-Adjusted Rate (95% CI)** | | | | | |
| --- | --- | --- | --- | --- | --- |
| **Year** | **NH White** | **NH Black or African American** | **NH American Indian or Alaska Native** | **Hispanic or Latino** | **NH Asian or Pacific Islander** |
| 1999 | 1.84 (1.77-1.91) | 1.86 (1.63-2.09) | N/A | 0.88 (0.67-1.15) | 0.96 (0.65-1.36) |
| 2000 | 1.83 (1.76-1.90) | 1.93 (1.70-2.16) | N/A | 1.12 (0.89-1.40) | 1.23 (0.87-1.68) |
| 2001 | 1.65 (1.59-1.71) | 1.99 (1.76-2.23) | N/A | 1.21 (0.97-1.49) | 1.17 (0.85-1.57) |
| 2002 | 1.63 (1.57-1.70) | 1.86 (1.64-2.09) | Unreliable (0.98-3.30) | 0.94 (0.74-1.18) | 1.10 (0.80-1.47) |
| 2003 | 1.50 (1.44-1.56) | 1.52 (1.32-1.72) | N/A | 1.09 (0.88-1.34) | 0.92 (0.66-1.25) |
| 2004 | 1.36 (1.30-1.42) | 1.35 (1.16-1.54) | N/A | 0.75 (0.59-0.95) | 0.97 (0.71-1.31) |
| 2005 | 1.31 (1.26-1.37) | 1.34 (1.15-1.52) | N/A | 1.00 (0.81-1.23) | 0.78 (0.55-1.07) |
| 2006 | 1.19 (1.14-1.25) | 1.18 (1.01-1.36) | N/A | 0.80 (0.63-1.00) | 0.74 (0.52-1.01) |
| 2007 | 1.08 (1.03-1.13) | 1.20 (1.03-1.38) | N/A | 0.70 (0.55-0.87) | 0.71 (0.51-0.97) |
| 2008 | 1.01 (0.96-1.06) | 1.22 (1.05-1.39) | N/A | 0.75 (0.60-0.93) | 0.47 (0.31-0.67) |
| 2009 | 0.85 (0.81-0.89) | 1.04 (0.89-1.20) | N/A | 0.71 (0.56-0.88) | 0.74 (0.54-0.98) |
| 2010 | 0.84 (0.79-0.88) | 0.87 (0.73-1.01) | N/A | 0.57 (0.45-0.73) | 0.55 (0.39-0.76) |
| 2011 | 0.75 (0.71-0.79) | 0.82 (0.68-0.95) | N/A | 0.57 (0.45-0.72) | 0.32 (0.20-0.48) |
| 2012 | 0.70 (0.66-0.73) | 0.73 (0.60-0.85) | N/A | 0.54 (0.43-0.68) | 0.47 (0.33-0.66) |
| 2013 | 0.65 (0.61-0.69) | 0.77 (0.64-0.90) | N/A | 0.46 (0.35-0.58) | 0.46 (0.33-0.63) |
| 2014 | 0.61 (0.57-0.65) | 0.58 (0.48-0.69) | N/A | 0.43 (0.33-0.54) | 0.34 (0.23-0.48) |
| 2015 | 0.56 (0.52-0.59) | 0.59 (0.48-0.69) | N/A | 0.45 (0.35-0.56) | 0.30 (0.20-0.43) |
| 2016 | 0.47 (0.44-0.50) | 0.55 (0.45-0.65) | N/A | 0.25 (0.18-0.33) | 0.25 (0.17-0.37) |
| 2017 | 0.50 (0.47-0.53) | 0.54 (0.45-0.64) | N/A | 0.40 (0.31-0.50) | 0.29 (0.20-0.41) |
| 2018 | 0.49 (0.46-0.52) | 0.54 (0.45-0.64) | N/A | 0.34 (0.26-0.44) | 0.29 (0.20-0.40) |
| 2019 | 0.45 (0.42-0.48) | 0.52 (0.43-0.61) | Unreliable (0.28-1.16) | 0.38 (0.30-0.47) | 0.20 (0.13-0.29) |
| 2020 | 0.46 (0.43-0.49) | 0.47 (0.38-0.55) | N/A | 0.33 (0.26-0.42) | 0.38 (0.28-0.50) |
| **Overall** | 0.95 (0.94-0.96) | 0.98 (0.95-1.01) | 0.59 (0.48-0.69) | 0.54 (0.51-0.57) | 0.50 (0.46-0.53) |

NH=Non-Hispanic ; N/A= not available (unreliable or suppressed)

**Supplemental Table 7** Ischemic Heart Disease-related Age-Adjusted Mortality Rates per 100,000 Stratified by State in Adult Colorectal Cancer Patients in the United States, 1999 to 2020

| **State** | **Age-Adjusted Rate (95% CI)** |
| --- | --- |
| Alabama | 0.53 (0.48-0.58) |
| Alaska | 0.59 (0.41-0.84) |
| Arizona | 0.50 (0.46-0.55) |
| Arkansas | 0.80 (0.71-0.88) |
| California | 1.11 (1.08-1.14) |
| Colorado | 0.51 (0.45-0.56) |
| Connecticut | 1.01 (0.93-1.09) |
| Delaware | 0.84 (0.69-0.99) |
| District of Columbia | 1.19 (0.95-1.42) |
| Florida | 0.65 (0.63-0.68) |
| Georgia | 0.49 (0.45-0.54) |
| Hawaii | 0.71 (0.60-0.81) |
| Idaho | 0.55 (0.45-0.64) |
| Illinois | 0.90 (0.85-0.94) |
| Indiana | 0.88 (0.82-0.94) |
| Iowa | 1.23 (1.14-1.32) |
| Kansas | 0.75 (0.67-0.83) |
| Kentucky | 0.81 (0.74-0.88) |
| Louisiana | 0.57 (0.51-0.63) |
| Maine | 0.92 (0.80-1.04) |
| Maryland | 1.12 (1.04-1.19) |
| Massachusetts | 0.72 (0.67-0.77) |
| Michigan | 0.96 (0.91-1.01) |
| Minnesota | 0.77 (0.71-0.82) |
| Mississippi | 0.89 (0.80-0.98) |
| Missouri | 0.92 (0.86-0.98) |
| Montana | 0.68 (0.55-0.80) |
| Nebraska | 1.05 (0.93-1.16) |
| Nevada | 0.53 (0.45-0.61) |
| New Hampshire | 0.81 (0.69-0.93) |
| New Jersey | 1.11 (1.06-1.17) |
| New Mexico | 0.59 (0.50-0.67) |
| New York | 1.62 (1.58-1.67) |
| North Carolina | 0.70 (0.66-0.75) |
| North Dakota | 1.18 (0.99-1.36) |
| Ohio | 1.18 (1.13-1.23) |
| Oklahoma | 1.08 (0.99-1.16) |
| Oregon | 0.66 (0.60-0.73) |
| Pennsylvania | 1.09 (1.05-1.13) |
| Rhode Island | 1.42 (1.25-1.59) |
| South Carolina | 0.59 (0.53-0.65) |
| South Dakota | 0.95 (0.79-1.11) |
| Tennessee | 0.92 (0.86-0.98) |
| Texas | 0.77 (0.73-0.80) |
| Utah | 0.33 (0.27-0.41) |
| Vermont | 1.11 (0.91-1.31) |
| Virginia | 0.62 (0.58-0.67) |
| Washington | 0.78 (0.73-0.84) |
| West Virginia | 1.31 (1.19-1.44) |
| Wisconsin | 0.72 (0.66-0.77) |
| Wyoming | 0.59 (0.43-0.79) |
| **Overall** | 0.91 (0.90-0.92) |

**Supplemental Table 8** Ischemic Heart Disease-related Age-Adjusted Mortality Rate per 100,000 Stratified by Census Region in Adult Colorectal Cancer Patients in the United States 1999-2020

| **Census Region** | **Year** | **Age-Adjusted Rate (95% CI)** |
| --- | --- | --- |
| Northeast | 1999 | 2.43 (2.28-2.59) |
| Northeast | 2000 | 2.28 (2.13-2.43) |
| Northeast | 2001 | 2.11 (1.97-2.26) |
| Northeast | 2002 | 2.13 (1.99-2.28) |
| Northeast | 2003 | 2.03 (1.89-2.17) |
| Northeast | 2004 | 1.76 (1.63-1.89) |
| Northeast | 2005 | 1.67 (1.54-1.79) |
| Northeast | 2006 | 1.44 (1.32-1.56) |
| Northeast | 2007 | 1.48 (1.36-1.60) |
| Northeast | 2008 | 1.34 (1.23-1.45) |
| Northeast | 2009 | 1.16 (1.06-1.27) |
| Northeast | 2010 | 1.08 (0.98-1.18) |
| Northeast | 2011 | 1.00 (0.91-1.10) |
| Northeast | 2012 | 0.92 (0.83-1.01) |
| Northeast | 2013 | 0.74 (0.66-0.82) |
| Northeast | 2014 | 0.82 (0.74-0.91) |
| Northeast | 2015 | 0.72 (0.64-0.79) |
| Northeast | 2016 | 0.61 (0.53-0.68) |
| Northeast | 2017 | 0.61 (0.54-0.68) |
| Northeast | 2018 | 0.55 (0.49-0.62) |
| Northeast | 2019 | 0.56 (0.50-0.63) |
| Northeast | 2020 | 0.57 (0.51-0.64) |
| Northeast | **Overall** | 1.24 (1.21-1.26) |
| Midwest | 1999 | 1.89 (1.76-2.02) |
| Midwest | 2000 | 1.83 (1.70-1.96) |
| Midwest | 2001 | 1.73 (1.61-1.85) |
| Midwest | 2002 | 1.58 (1.46-1.70) |
| Midwest | 2003 | 1.52 (1.40-1.63) |
| Midwest | 2004 | 1.35 (1.25-1.46) |
| Midwest | 2005 | 1.30 (1.20-1.41) |
| Midwest | 2006 | 1.23 (1.13-1.33) |
| Midwest | 2007 | 1.05 (0.96-1.14) |
| Midwest | 2008 | 1.09 (1.00-1.19) |
| Midwest | 2009 | 0.80 (0.72-0.88) |
| Midwest | 2010 | 0.85 (0.77-0.93) |
| Midwest | 2011 | 0.74 (0.66-0.81) |
| Midwest | 2012 | 0.70 (0.63-0.77) |
| Midwest | 2013 | 0.67 (0.60-0.74) |
| Midwest | 2014 | 0.59 (0.52-0.65) |
| Midwest | 2015 | 0.58 (0.52-0.65) |
| Midwest | 2016 | 0.45 (0.40-0.51) |
| Midwest | 2017 | 0.50 (0.44-0.56) |
| Midwest | 2018 | 0.51 (0.45-0.57) |
| Midwest | 2019 | 0.49 (0.43-0.54) |
| Midwest | 2020 | 0.42 (0.37-0.48) |
| Midwest | **Overall** | 0.96 (0.94-0.98) |
| South | 1999 | 1.35 (1.25-1.44) |
| South | 2000 | 1.48 (1.38-1.57) |
| South | 2001 | 1.32 (1.23-1.41) |
| South | 2002 | 1.36 (1.27-1.45) |
| South | 2003 | 1.22 (1.13-1.30) |
| South | 2004 | 1.05 (0.97-1.13) |
| South | 2005 | 1.00 (0.92-1.07) |
| South | 2006 | 0.89 (0.82-0.96) |
| South | 2007 | 0.85 (0.79-0.92) |
| South | 2008 | 0.76 (0.69-0.82) |
| South | 2009 | 0.74 (0.68-0.80) |
| South | 2010 | 0.65 (0.59-0.71) |
| South | 2011 | 0.57 (0.52-0.63) |
| South | 2012 | 0.59 (0.53-0.64) |
| South | 2013 | 0.52 (0.47-0.57) |
| South | 2014 | 0.47 (0.43-0.52) |
| South | 2015 | 0.45 (0.40-0.49) |
| South | 2016 | 0.38 (0.34-0.42) |
| South | 2017 | 0.45 (0.40-0.49) |
| South | 2018 | 0.41 (0.37-0.46) |
| South | 2019 | 0.42 (0.38-0.46) |
| South | 2020 | 0.41 (0.37-0.45) |
| South | **Overall** | 0.74 (0.72-0.75) |
| West | 1999 | 1.75 (1.61-1.89) |
| West | 2000 | 1.76 (1.62-1.90) |
| West | 2001 | 1.61 (1.48-1.74) |
| West | 2002 | 1.54 (1.42-1.67) |
| West | 2003 | 1.41 (1.29-1.53) |
| West | 2004 | 1.28 (1.16-1.39) |
| West | 2005 | 1.30 (1.19-1.42) |
| West | 2006 | 1.20 (1.09-1.31) |
| West | 2007 | 0.97 (0.88-1.07) |
| West | 2008 | 0.89 (0.80-0.98) |
| West | 2009 | 0.85 (0.77-0.94) |
| West | 2010 | 0.79 (0.71-0.87) |
| West | 2011 | 0.71 (0.63-0.78) |
| West | 2012 | 0.64 (0.57-0.71) |
| West | 2013 | 0.63 (0.56-0.70) |
| West | 2014 | 0.55 (0.48-0.61) |
| West | 2015 | 0.51 (0.45-0.57) |
| West | 2016 | 0.45 (0.40-0.51) |
| West | 2017 | 0.44 (0.39-0.50) |
| West | 2018 | 0.45 (0.39-0.50) |
| West | 2019 | 0.40 (0.35-0.46) |
| West | 2020 | 0.49 (0.43-0.54) |
| West | **Overall** | 0.86 (0.85-0.88) |

**Supplemental Table 9** Overall Ischemic Heart Disease–related Age-Adjusted Mortality Rates per 100,000 in Adult Colorectal Cancer Patients in the Metropolitan and Non-metropolitan areas in the United States, 1999 to 2020

| **Age-Adjusted Rate (95% CI)** | | |
| --- | --- | --- |
| **Year** | **Metropolitan** | **Nonmetropolitan** |
| 1999 | 1.83 (1.76-1.91) | 1.71 (1.57-1.85) |
| 2000 | 1.82 (1.75-1.89) | 1.67 (1.53-1.80) |
| 2001 | 1.67 (1.60-1.73) | 1.59 (1.46-1.72) |
| 2002 | 1.62 (1.56-1.69) | 1.61 (1.48-1.75) |
| 2003 | 1.48 (1.42-1.54) | 1.54 (1.41-1.66) |
| 2004 | 1.29 (1.24-1.35) | 1.37 (1.25-1.49) |
| 2005 | 1.27 (1.21-1.33) | 1.32 (1.20-1.43) |
| 2006 | 1.14 (1.09-1.19) | 1.22 (1.10-1.33) |
| 2007 | 1.04 (0.99-1.09) | 1.12 (1.02-1.23) |
| 2008 | 0.97 (0.92-1.02) | 1.07 (0.97-1.18) |
| 2009 | 0.87 (0.82-0.91) | 0.87 (0.77-0.96) |
| 2010 | 0.80 (0.76-0.84) | 0.90 (0.80-1.00) |
| 2011 | 0.69 (0.65-0.73) | 0.83 (0.74-0.92) |
| 2012 | 0.65 (0.61-0.69) | 0.84 (0.75-0.93) |
| 2013 | 0.59 (0.55-0.62) | 0.78 (0.69-0.87) |
| 2014 | 0.59 (0.56-0.63) | 0.62 (0.54-0.69) |
| 2015 | 0.53 (0.50-0.56) | 0.59 (0.51-0.66) |
| 2016 | 0.43 (0.40-0.46) | 0.51 (0.44-0.58) |
| 2017 | 0.45 (0.42-0.48) | 0.65 (0.58-0.73) |
| 2018 | 0.46 (0.43-0.49) | 0.60 (0.52-0.67) |
| 2019 | 0.43 (0.40-0.46) | 0.59 (0.51-0.66) |
| 2020 | 0.42 (0.39-0.44) | 0.58 (0.51-0.65) |
| **Overall** | 0.90 (0.89-0.91) | 0.99 (0.97-1.02) |
